# Supplementary material for: An alternative protocol for Plasmodium falciparum culture synchronization and a new method for synchrony confirmation
Source: PubMed Central journal article supplement (PMC3819685; doi:10.1186/1475-2875-12-386), 2013-11-01

6hr

12hr

18hr

24hr

30hr

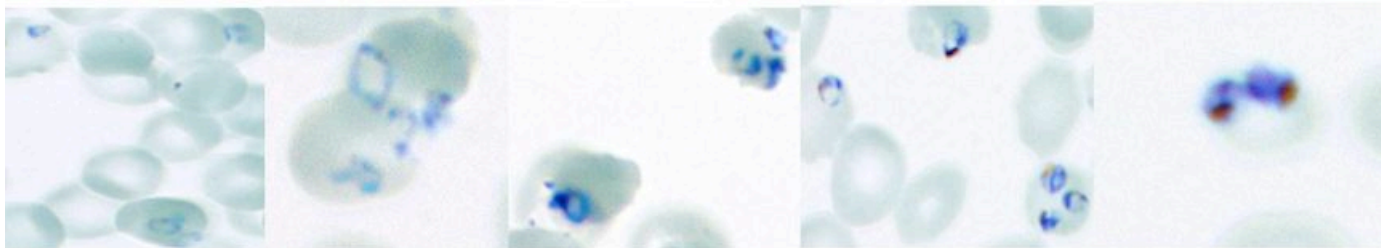

36hr

42hr

48hr/0hr

54hr/6hr

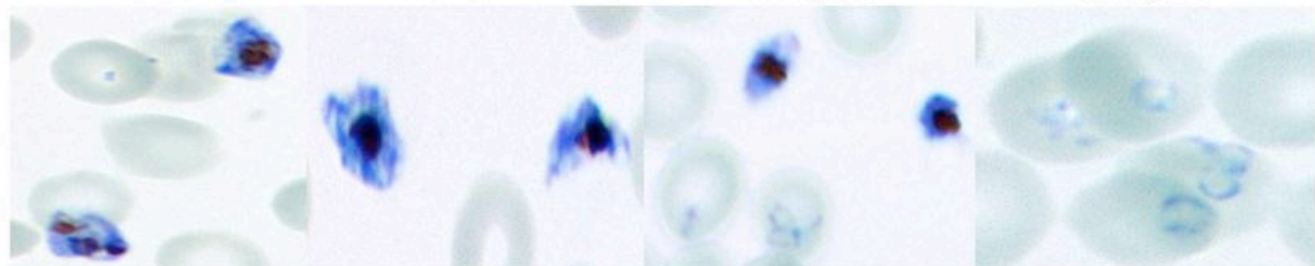

60hr/12hr

66hr/18hr

72hr/24hr

78hr/30hr

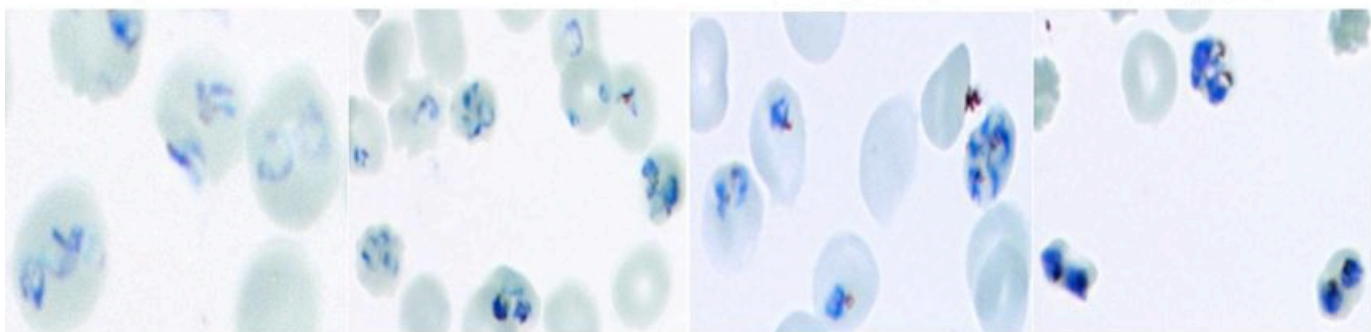

84hr/36hr

90hr/42hrs

96hr/48hrs

102hr/6hrs

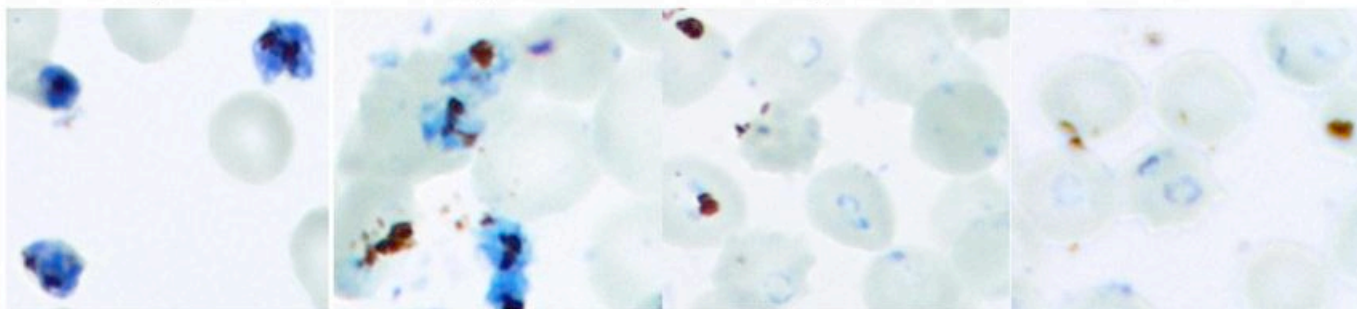

Supplement: 1475-2875-12-386-S5.pdf [file 1475-2875-12-386-S5.pdf]
