# Supplementary material for: An alternative protocol for Plasmodium falciparum culture synchronization and a new method for synchrony confirmation
Source: PubMed Central journal article supplement (PMC3819685; doi:10.1186/1475-2875-12-386), 2013-11-01

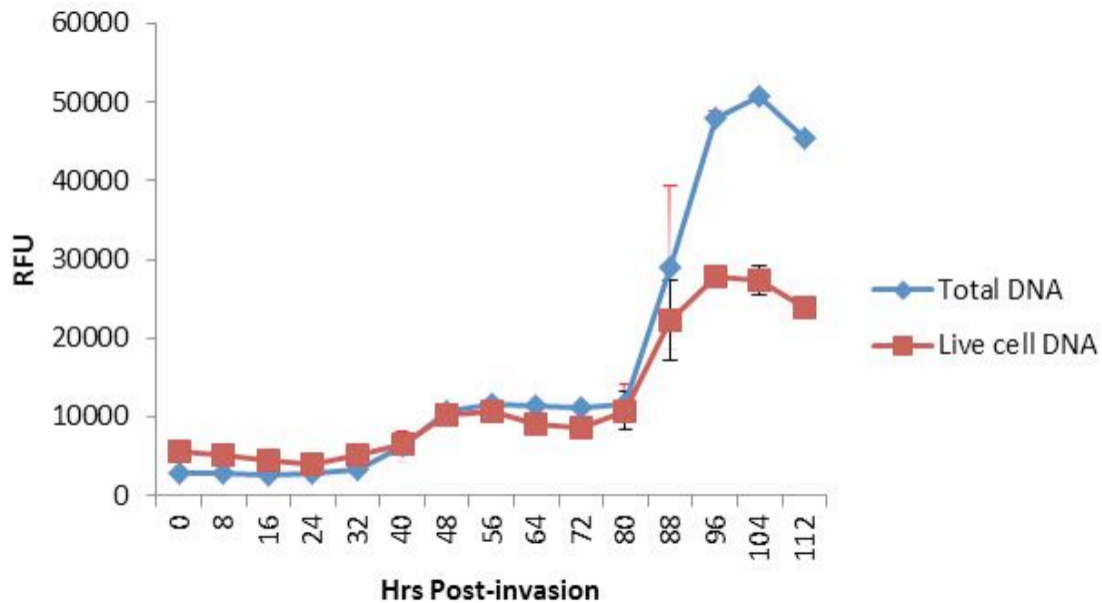

Supplement: 1475-2875-12-386-S6.pdf [file 1475-2875-12-386-S6.pdf]
